# Supplementary material for: Climate-dependent propagation of precipitation uncertainty into the water cycle
Source: Copernicus journal article supplement (doi:10.5194/hess-24-3725-2020), 2020-07-23
Supplement: Supplementary file 1 [file hess-24-3725-2020-supplement.pdf]

Supplement of Hydrol. Earth Syst. Sci., 24, 3725–3735, 2020  
<https://doi.org/10.5194/hess-24-3725-2020-supplement>  
© Author(s) 2020. This work is distributed under  
the Creative Commons Attribution 4.0 License.

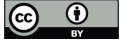

*Supplement of*

## **Climate-dependent propagation of precipitation uncertainty into the water cycle**

**Ali Fallah et al.**

*Correspondence to:* Ali Fallah (alifallah@shirazu.ac.ir, afallah@bgc-jena.mpg.de)

The copyright of individual parts of the supplement might differ from the CC BY 4.0 License.

**Table S1: Summary of model parameters.**

| <b>Parameter</b>         | <b>Meaning</b>                                                    | <b>Considered range</b> |
|--------------------------|-------------------------------------------------------------------|-------------------------|
| Water holding capacity   | Maximum water storage                                             | 56–1485mm               |
| Runoff function exponent | Sensitivity of (normalized) runoff to soil moisture               | 0.53–15                 |
| ET function exponent     | Sensitivity of evaporative fraction to soil moisture              | 0.04–1.25               |
| maximum ET ratio         | Maximum fraction of net radiation that can be transformed into ET | 0.30–0.99               |
| Melting parameter        | Speed of snow melting                                             | 0.19–11.7               |
| Runoff delay             | Conversion of runoff to streamflow                                | 0.05–0.85               |

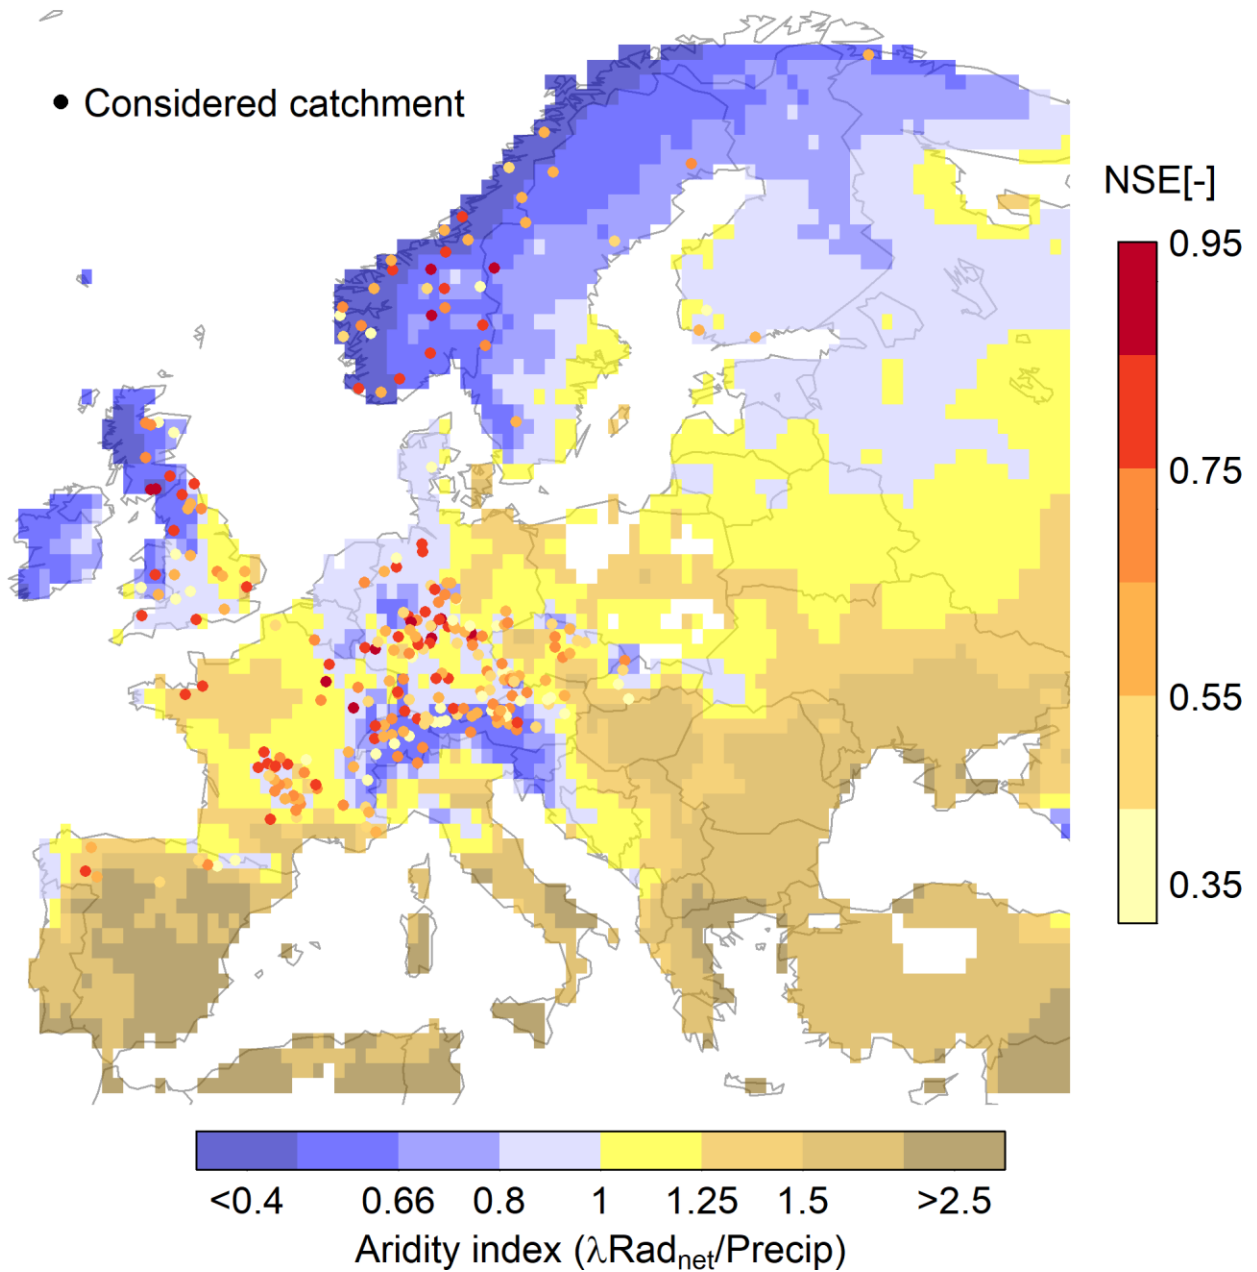

Figure S1: Same as figure 1 in the main text, but with NSE values obtained from the model calibration using E-OBS data. Only catchments where  $\text{NSE} \geq 0.36$  are shown.

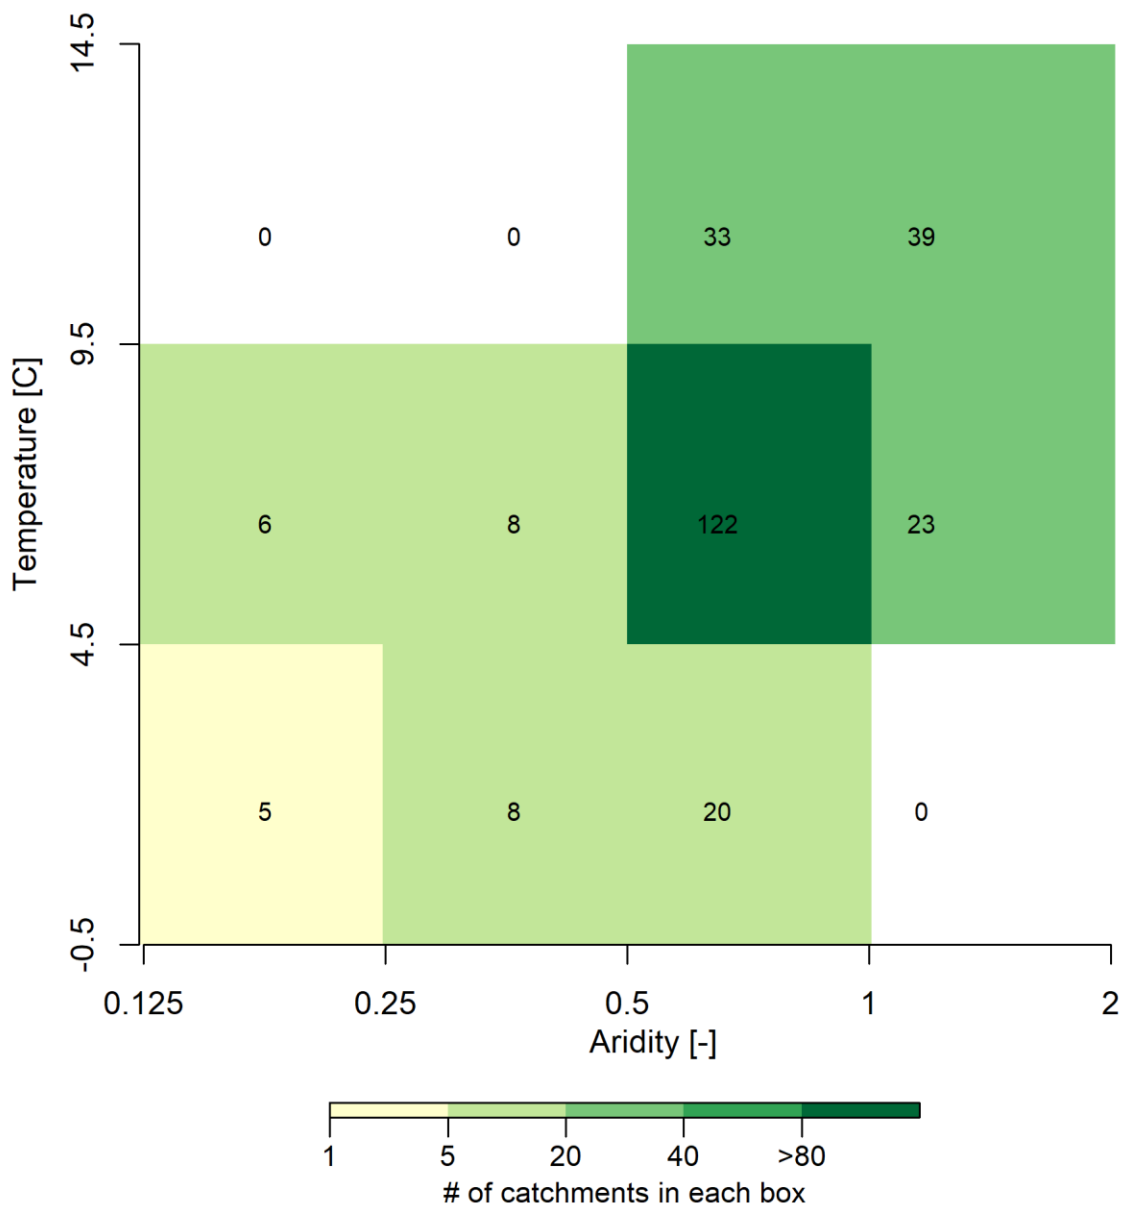

Figure S2: Number of considered catchments in each hydro-climatological regime at the monthly scale. Overall, 264 catchments across Europe are evaluated in this study.

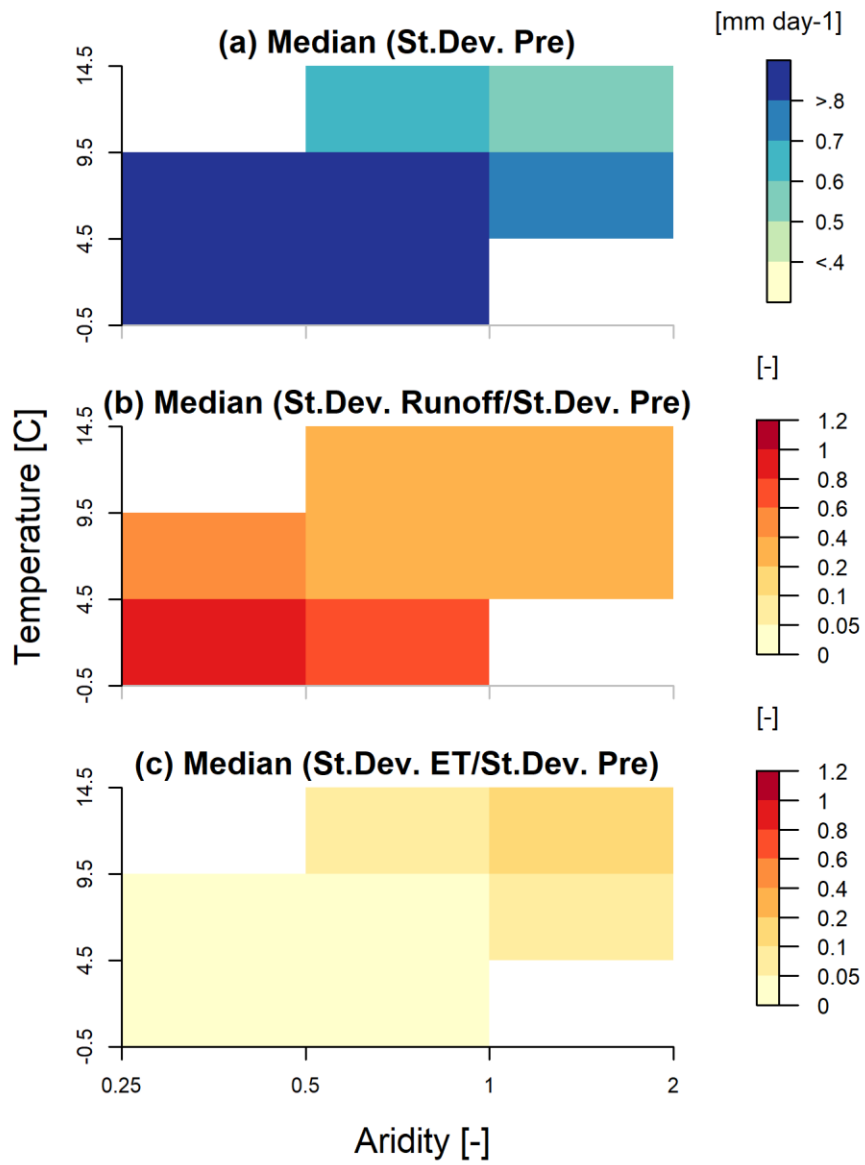

Figure S3: Same as figure 4 in the main text, but with results computed based on daily time series.

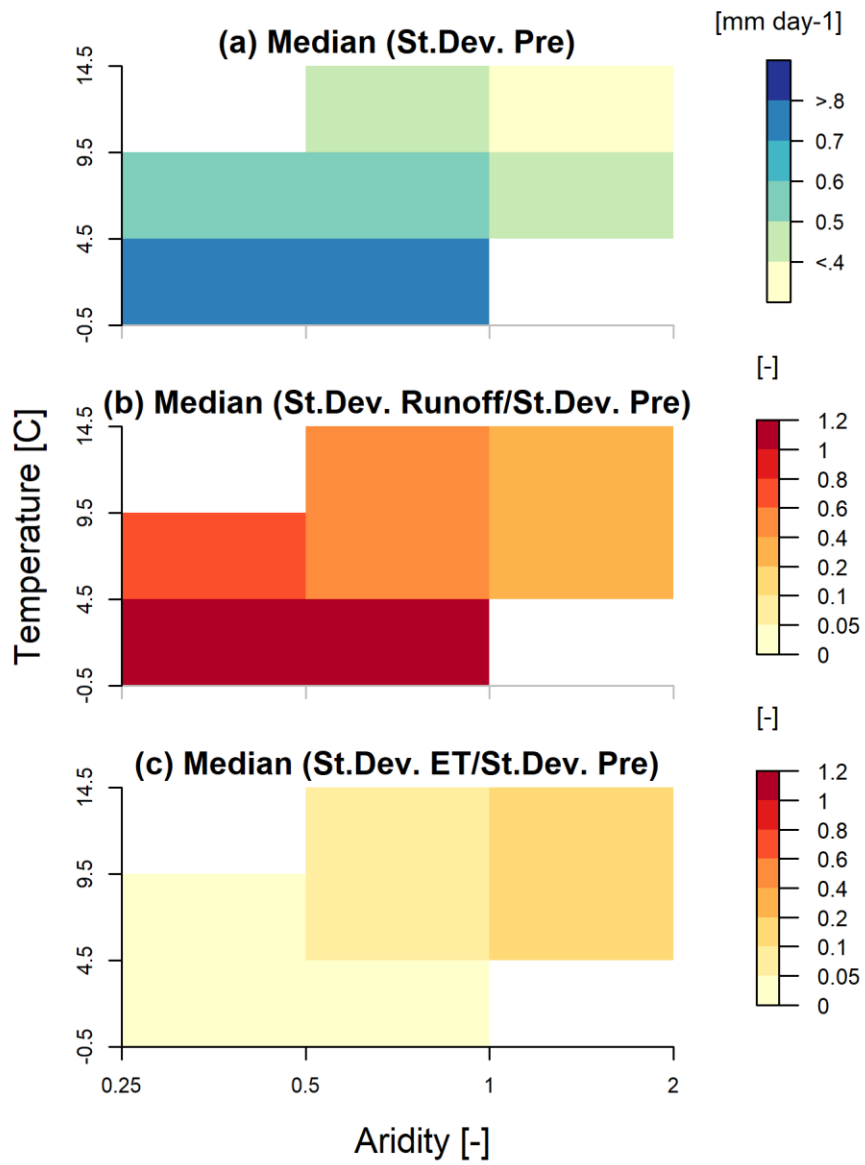

Figure S4: Same as figure 4 in the main text, but with results obtained from the model calibrated using GPCC precipitation data.

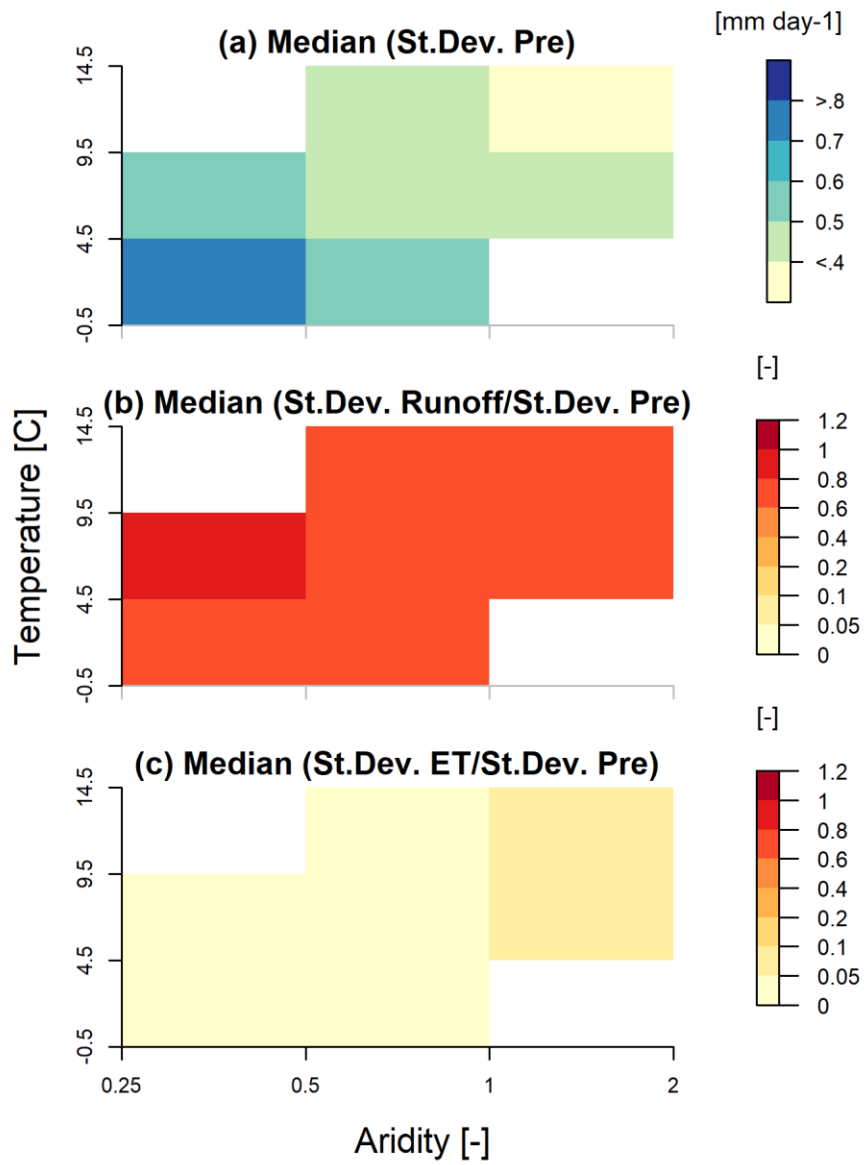

Figure S5: Same as figure 4 in the main text, but with results computed for whole year.

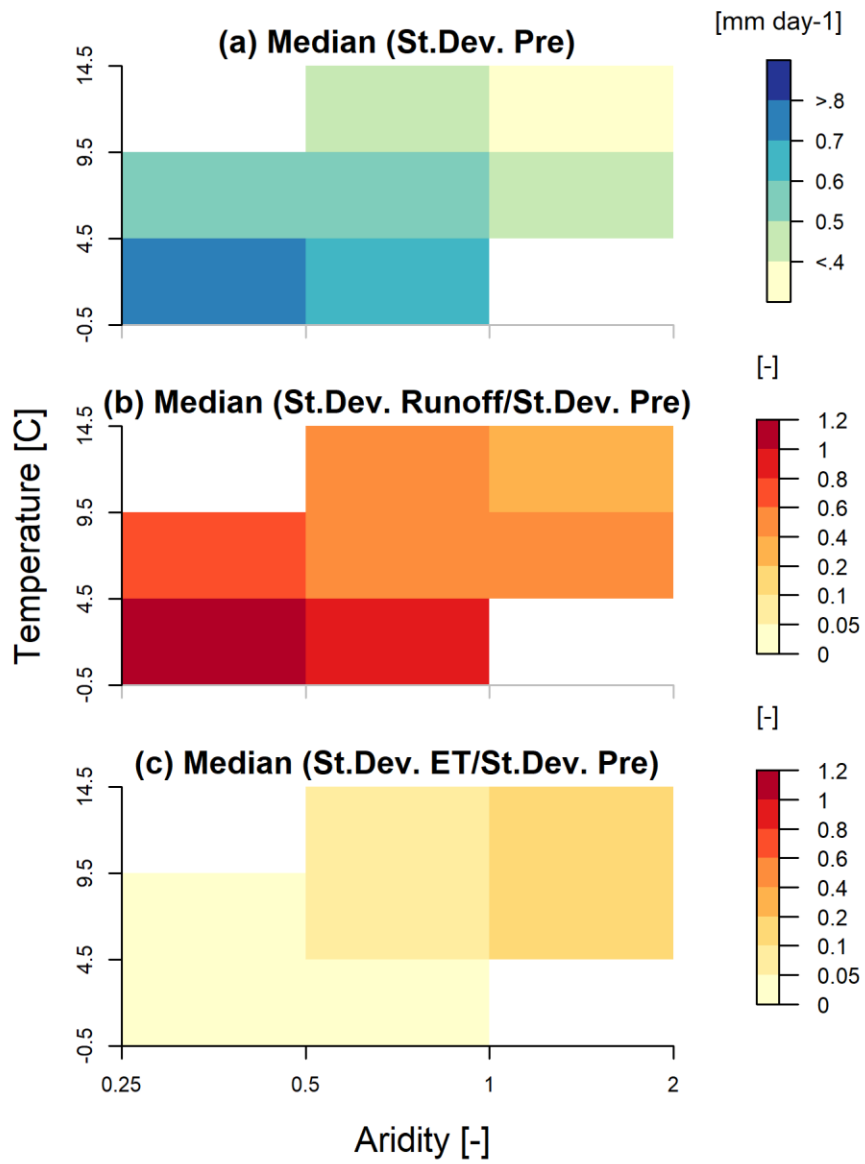

Figure S6: Same as figure 4 in the main text, but with results obtained from filtering catchments with  $NSE \geq 0.5$ .



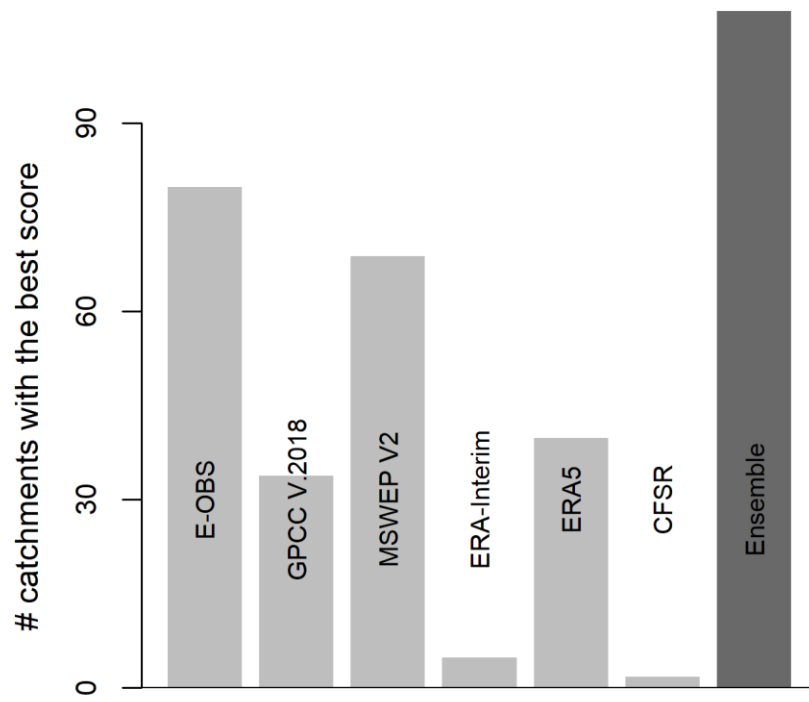

Figure S7: Same as figure 5 in the main text, but with results obtained from daily time series.

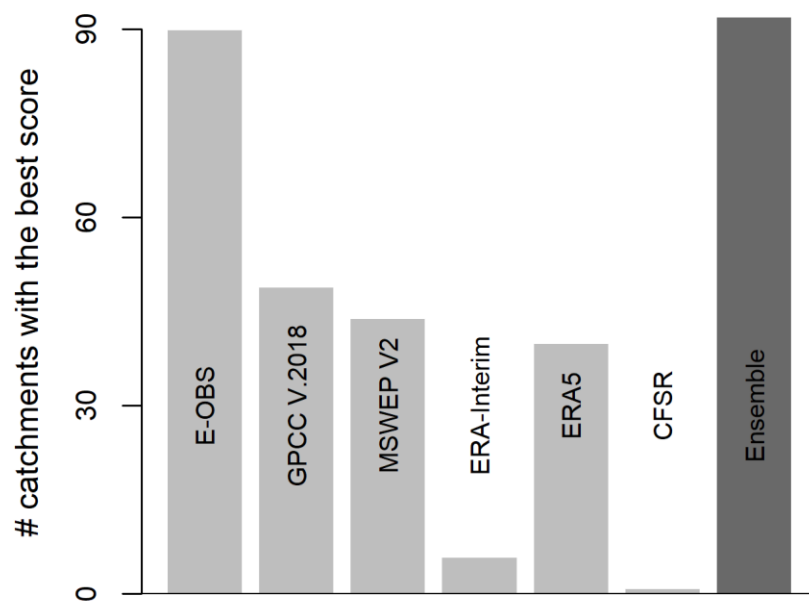

Figure S8: Same as figure 5 in the main text, but with results computed for whole year.

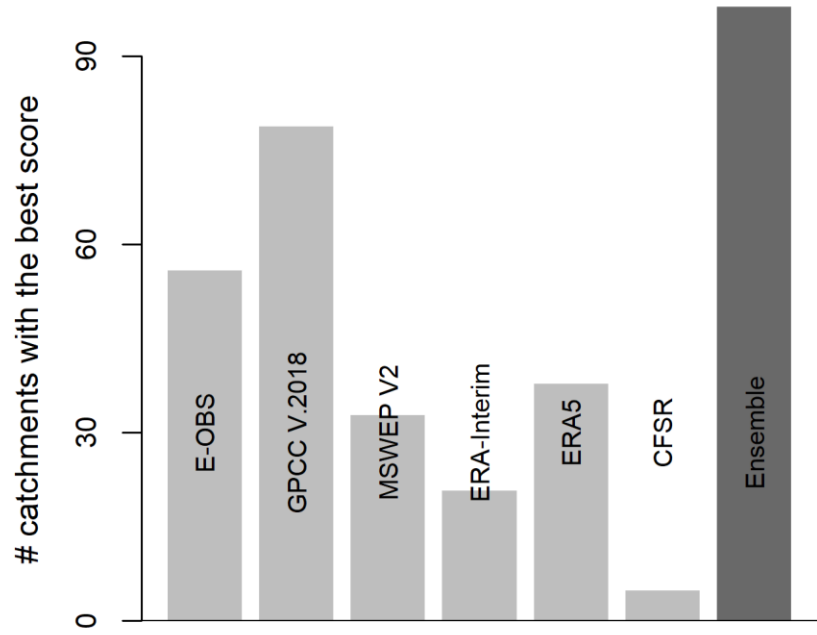

Figure S9: Same as figure 5 in the main text, but with results obtained from the model calibrated using GPCC precipitation data.

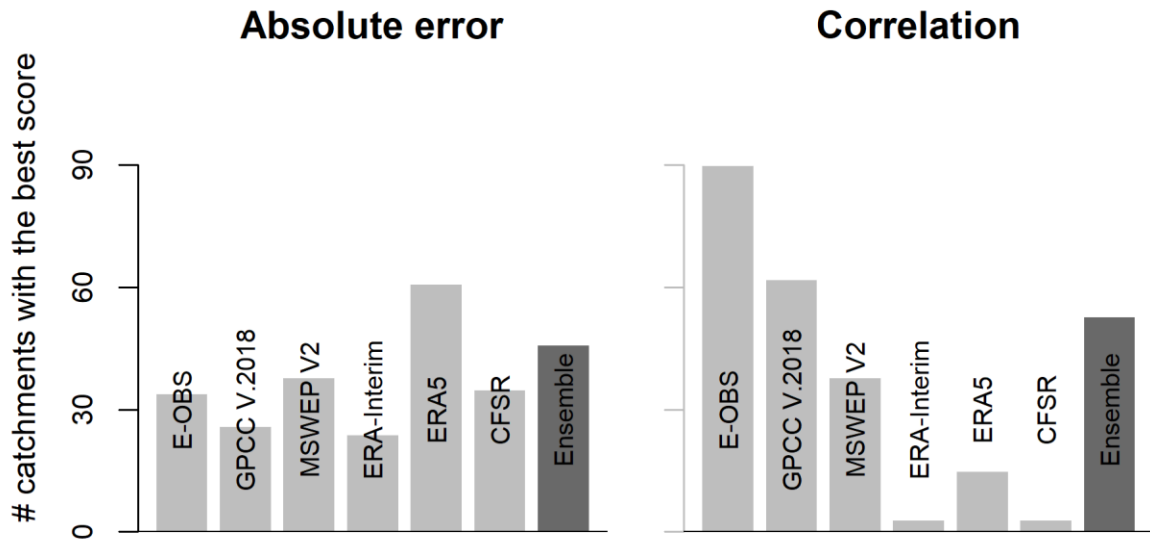

Figure S10: Same as figure S8 , but with results obtained from absolute error and correlation separately.
